# Supplementary material for: Using Machine Learning Algorithms to Develop a Clinical Decision-Making Tool for COVID-19 Inpatients
Source: MDPI journal article supplement (doi:10.3390/ijerph18126228), 2021-06-09
Supplement: s1 [file s1]

## Supplementary Tables and Figures

**Table S1:** List and definitions of independent predictor variables

| <b>Independent Predictor Variables (p=44)</b> | <b>Definition</b>                                                                                                                                                                                                                                                                      |
|-----------------------------------------------|----------------------------------------------------------------------------------------------------------------------------------------------------------------------------------------------------------------------------------------------------------------------------------------|
| Age                                           | The number of completed years since self-reported date of birth (years)                                                                                                                                                                                                                |
| Gender                                        | Self-reported gender by study participant (male or female)                                                                                                                                                                                                                             |
| Ethnicity                                     | Self-reported ethnicity by study participant (Caucasian or BAME). 'Mixed' ethnicities and 'other' ethnicities were classified as BAME.                                                                                                                                                 |
| Oxygen Saturations                            | The lowest oxygen saturation reading obtained by nursing staff on the day of COVID-19 clinical presentation whilst an inpatient (%)                                                                                                                                                    |
| Respiratory Rate                              | The highest respiratory rate reading obtained by nursing staff on the day of COVID-19 clinical presentation whilst an inpatient (breaths per minute)                                                                                                                                   |
| Temperature                                   | The highest temperature reading obtained by nursing staff on the day of COVID-19 clinical presentation whilst an inpatient (°Celsius to 1 decimal point)                                                                                                                               |
| Obesity                                       | A body mass index more than 30, or a clinical diagnosis of obesity documented within the patients past medical history (Yes or No)                                                                                                                                                     |
| Previous Venous Thromboembolism               | A confirmed clinical diagnosis of any venous thromboembolism documented within the patients past medical history or a patient who is prescribed a treatment dose of anticoagulation (Yes or No)                                                                                        |
| Chronic Obstructive Pulmonary Disease         | A confirmed clinical diagnosis of emphysema, bronchitis, or chronic obstructive pulmonary disease documented within the patients past medical history, or, a study participant with smoking history who is prescribed a long-term bronchodilator or corticosteroid inhaler (Yes or No) |
| Bronchiectasis                                | A confirmed clinical diagnosis of bronchiectasis documented within the patients past medical history (Yes or No)                                                                                                                                                                       |
| Asthma                                        | A confirmed clinical diagnosis of asthma documented within the patients past medical history (Yes or No)                                                                                                                                                                               |
| Interstitial Lung Disease                     | A confirmed clinical diagnosis of interstitial lung disease or pulmonary fibrosis documented within the patients past medical history (Yes or No)                                                                                                                                      |
| Lung Cancer                                   | A confirmed clinical diagnosis of lung cancer documented within the patients past medical history (Yes or No)                                                                                                                                                                          |
| Neuromuscular Disease                         | Any neurological or neuromuscular disease confirmed by clinical diagnosis documented within the patients past medical history such as strokes, epilepsy, and Parkinson disease (Yes or No)                                                                                             |
| Diabetes Mellitus                             | A confirmed clinical diagnosis of diabetes mellitus documented within the patients past medical history or a study participant who is prescribed long-term oral hypoglycaemic drugs or insulin (Yes or No)                                                                             |
| Hypertension                                  | A confirmed clinical diagnosis of hypertension documented within the patients past medical history or a study participant who is prescribed long-term antihypertensive drugs (Yes or No)                                                                                               |
| Ischaemic Heart Disease                       | A confirmed clinical diagnosis of ischaemic heart disease documented within the patients past medical history or a study participant who is prescribed a long-term antiplatelet drug (Yes or No)                                                                                       |

| <b>Independent Predictor Variables (p=44)</b>   | <b>Definition</b>                                                                                                                                                                             |
|-------------------------------------------------|-----------------------------------------------------------------------------------------------------------------------------------------------------------------------------------------------|
| Chronic Kidney Disease                          | A confirmed clinical diagnosis of chronic kidney disease documented within the patients past medical history or a baseline estimated glomerular filtration rate of < 60 (Yes or No)           |
| Non-steroidal anti-inflammatory drugs           | Repeat prescription, within the last 3 months, of oral non-steroidal anti-inflammatory drugs documented within the patient's drug history (Yes or No)                                         |
| Anticoagulant                                   | Repeat prescription, within the last 3 months, of anticoagulation documented within the patient's drug history (Yes or No)                                                                    |
| Antibiotics                                     | Repeat prescription, within the last 3 months, of antibiotics documented within the patient's drug history (Yes or No)                                                                        |
| Immunosuppressants                              | Repeat prescription, within the last 3 months, of immunosuppressants, excluding corticosteroids and previous completed chemotherapy, documented within the patient's drug history (Yes or No) |
| Corticosteroids                                 | Repeat prescription, within the last 3 months, of oral corticosteroids documented within the patient's drug history (Yes or No)                                                               |
| Angiotensin Converting Enzyme Inhibitors        | Repeat prescription, within the last 3 months, of angiotensin converting enzyme inhibitors documented within the patient's drug history (Yes or No)                                           |
| Angiotensin Receptor Blockers                   | Repeat prescription, within the last 3 months, of angiotensin receptor blockers documented within the patient's drug history (Yes or No)                                                      |
| CT imaging severity of COVID-19 related changes | Extent of air-space consolidation or ground-glass opacification in lung tissue on CT scans, where available, performed during inpatient stay (unilateral or bilateral)                        |
| COVID-19 related Chest X-Ray changes            | Shadowing, consolidation, or haziness attributed to COVID-19 by a consultant radiologist on a chest X-Ray, where available, performed during inpatient stay (Yes or No)                       |
| Lactate                                         | Lactate level displayed on blood gas measurement, where available, performed on the day of COVID-19 clinical presentation (mmol/L)                                                            |
| Lymphocytes                                     | Lymphocyte count in blood sample obtained by venepuncture, where available, performed on the day of COVID-19 clinical presentation (10 <sup>9</sup> /L)                                       |
| Neutrophils                                     | Neutrophil count in blood sample obtained by venepuncture, where available, performed on the day of COVID-19 clinical presentation (10 <sup>9</sup> /L)                                       |
| Albumin                                         | Minimum albumin across all blood samples obtained by venepuncture, where available, throughout the inpatient stay (g/L)                                                                       |
| Ferritin                                        | Maximum ferritin across all blood samples obtained by venepuncture, where available, throughout the inpatient stay (ng/L)                                                                     |
| D-Dimer                                         | Maximum D-Dimer across all blood samples obtained by venepuncture, where available, throughout the inpatient stay (ng/ml)                                                                     |
| Fibrinogen                                      | Maximum fibrinogen across all blood samples obtained by venepuncture, where available, throughout the inpatient stay (g/L)                                                                    |
| Troponin                                        | Maximum troponin across all blood samples obtained by venepuncture, where available, throughout the inpatient stay (local units)                                                              |
| C-Reactive Protein (CRP) Day 0                  | CRP in blood sample obtained by venepuncture, where available, performed on the day of COVID-19 clinical presentation (mg/L)                                                                  |
| CRP Day 1-2                                     | Maximum CRP in blood sample obtained by venepuncture performed between days 1 and 2 since the day of COVID-19 clinical presentation, where available (mg/L)                                   |

| Independent Predictor Variables (p=44) | Definition                                                                                                                                                    |
|----------------------------------------|---------------------------------------------------------------------------------------------------------------------------------------------------------------|
| CRP Day 3-4                            | Maximum CRP in blood sample obtained by venepuncture performed between days 3 and 4 since the day of COVID-19 clinical presentation, where available (mg/L)   |
| CRP Day 5-6                            | Maximum CRP in blood sample obtained by venepuncture performed between days 5 and 6 since the day of COVID-19 clinical presentation, where available (mg/L)   |
| CRP Day 7-8                            | Maximum CRP in blood sample obtained by venepuncture performed between days 7 and 8 since the day of COVID-19 clinical presentation, where available (mg/L)   |
| CRP Day 9-10                           | Maximum CRP in blood sample obtained by venepuncture performed between days 9 and 10 since the day of COVID-19 clinical presentation, where available (mg/L)  |
| CRP Day 11-12                          | Maximum CRP in blood sample obtained by venepuncture performed between days 11 and 12 since the day of COVID-19 clinical presentation, where available (mg/L) |
| CRP Day 13-14                          | Maximum CRP in blood sample obtained by venepuncture performed between days 13 and 14 since the day of COVID-19 clinical presentation, where available (mg/L) |
| CRP Day 15-20                          | Maximum CRP in blood sample obtained by venepuncture performed between days 15 and 20 since the day of COVID-19 clinical presentation, where available (mg/L) |

**Table S2:** Patient Characteristics and descriptive statistics

| Demographics (n=355)                      |        |                |                |                     |      |                    |
|-------------------------------------------|--------|----------------|----------------|---------------------|------|--------------------|
| Male (%)                                  | 52     |                |                |                     |      |                    |
| Non-Caucasian (%)                         | 30     |                |                |                     |      |                    |
| Age (Years)                               | Median | Upper Quartile | Lower Quartile | Interquartile Range | Mean | Standard Deviation |
|                                           | 65     | 81             | 52             | 29                  | 65   | 18                 |
| Vital Observations (n=355)                |        |                |                |                     |      |                    |
|                                           | Median | Upper Quartile | Lower Quartile | Interquartile Range | Mean | Standard Deviation |
| Oxygen Saturation (%)                     | 93     | 96             | 89             | 7                   | 91   | 8                  |
| Respiratory Rate (breaths per minute)     | 24     | 28             | 20             | 8                   | 25   | 7                  |
| Temperature (°Celsius)                    | 37.9   | 38.6           | 37.1           | 1.5                 | 37.9 | 1.0                |
| Comorbidities and Medications (%) (n=355) |        |                |                |                     |      |                    |

|                                              |         |        |                |                |                     |                    |
|----------------------------------------------|---------|--------|----------------|----------------|---------------------|--------------------|
| Obesity                                      | 34.3    |        |                |                |                     |                    |
| Previous Venous Thromboembolism              | 6.5     |        |                |                |                     |                    |
| Chronic Obstructive Pulmonary Disease        | 11.5    |        |                |                |                     |                    |
| Bronchiectasis                               | 2       |        |                |                |                     |                    |
| Asthma                                       | 9.9     |        |                |                |                     |                    |
| Interstitial Lung Disease                    | 2.3     |        |                |                |                     |                    |
| Lung Cancer                                  | 2.5     |        |                |                |                     |                    |
| Neuromuscular Disease                        | 15.8    |        |                |                |                     |                    |
| Diabetes Mellitus                            | 24.2    |        |                |                |                     |                    |
| Hypertension                                 | 36      |        |                |                |                     |                    |
| Ischaemic Heart Disease                      | 12.1    |        |                |                |                     |                    |
| Chronic Kidney Disease                       | 13.2    |        |                |                |                     |                    |
| Non-steroidal anti-inflammatory drugs        | 3.1     |        |                |                |                     |                    |
| Anticoagulant                                | 16.9    |        |                |                |                     |                    |
| Antibiotics                                  | 3.1     |        |                |                |                     |                    |
| Immunosuppressants                           | 5       |        |                |                |                     |                    |
| Corticosteroids                              | 4.2     |        |                |                |                     |                    |
| Angiotensin Converting Enzyme Inhibitors     | 15.2    |        |                |                |                     |                    |
| Angiotensin Receptor Blockers                | 6.8     |        |                |                |                     |                    |
| Radiographic Changes (%)                     |         |        |                |                |                     |                    |
| Bilateral COVID-19 CT changes (n=117)        | 91.5    |        |                |                |                     |                    |
| COVID-19 Chest X-Ray Changes (n=341)         | 69.5    |        |                |                |                     |                    |
| Biochemical Markers                          |         |        |                |                |                     |                    |
|                                              | Mean    | Median | Upper Quartile | Lower Quartile | Interquartile Range | Standard Deviation |
| Lactate (mmol/L), n=242                      | 1.85    | 1.4    | 2              | 1.1            | 0.9                 | 1.63               |
| Lymphocytes (10 <sup>9</sup> /L), n=351      | 1.10    | 1      | 1.3            | 0.7            | 0.6                 | 0.67               |
| Neutrophils (10 <sup>9</sup> /L), n=351      | 6.75    | 5.4    | 8.8            | 3.25           | 5.55                | 4.86               |
| Albumin (g/L), n=341                         | 31.38   | 31     | 36             | 27             | 9                   | 6.6                |
| Ferritin (ng/L), n=51                        | 866.33  | 725    | 1371.5         | 264.5          | 1107                | 760.43             |
| D-Dimer (ng/ml), n=115                       | 2604.11 | 656    | 2163           | 344.5          | 1818.5              | 7016.26            |
| Fibrinogen (g/L), n=18                       | 44.91   | 5.85   | 8.56           | 4.41           | 4.15                | 121.97             |
| Troponin (Local units), n=75                 | 628.2   | 30.9   | 90.9           | 7.35           | 83.55               | 3201.81            |
| C-Reactive Protein (CRP) Day 0 (mg/L), n=337 | 110.39  | 96     | 164            | 39             | 125                 | 89.13              |
| CRP Day 1-2 (mg/L), n=217                    | 152.36  | 142    | 212            | 77             | 135                 | 94.84              |
| CRP Day 3-4 (mg/L), n=185                    | 146     | 117    | 203            | 67             | 136                 | 106.14             |

|                               |        |      |       |      |       |        |
|-------------------------------|--------|------|-------|------|-------|--------|
| CRP Day 5-6<br>(mg/L), n=139  | 132.6  | 111  | 187   | 55.5 | 131.5 | 103.54 |
| CRP Day 7-8<br>(mg/L), n=106  | 117.92 | 87.5 | 164   | 46   | 118   | 99.67  |
| CRP Day 9-10<br>(mg/L), n=75  | 122.65 | 98   | 170.5 | 51.5 | 119   | 95.25  |
| CRP Day 11-12<br>(mg/L), n=63 | 94.46  | 73   | 124.5 | 33.5 | 91    | 83.15  |
| CRP Day 13-14<br>(mg/L), n=43 | 91.6   | 65   | 121   | 38.5 | 82.5  | 77.49  |
| CRP Day 15-20<br>(mg/L), n=36 | 97.43  | 57.5 | 133.5 | 26.5 | 107   | 91.67  |

**Table S3:** The heat-mapped probabilities of inpatient death of patients at different age groups. As shown, the death rate of COVID-19 patients'  $\geq 70$  years is 5 times larger than patients'  $\leq 40$  years.

| Inpatient Mortality (IPD) | Age Category (Years) |         |           |
|---------------------------|----------------------|---------|-----------|
|                           | $\leq 40$            | 41 – 69 | $70 \leq$ |
| Yes                       | 13.97%               | 31.50%  | 68.30%    |
| No                        | 86.03%               | 68.50%  | 31.70%    |

**Table S4:** The heat-mapped probabilities of death and survival of patients based on OS.

| Inpatient Mortality (IPD) | OS (%)    |        |
|---------------------------|-----------|--------|
|                           | $\geq 92$ | $< 92$ |
| Yes                       | 48.90%    | 50.90% |
| No                        | 51.10%    | 49.10% |

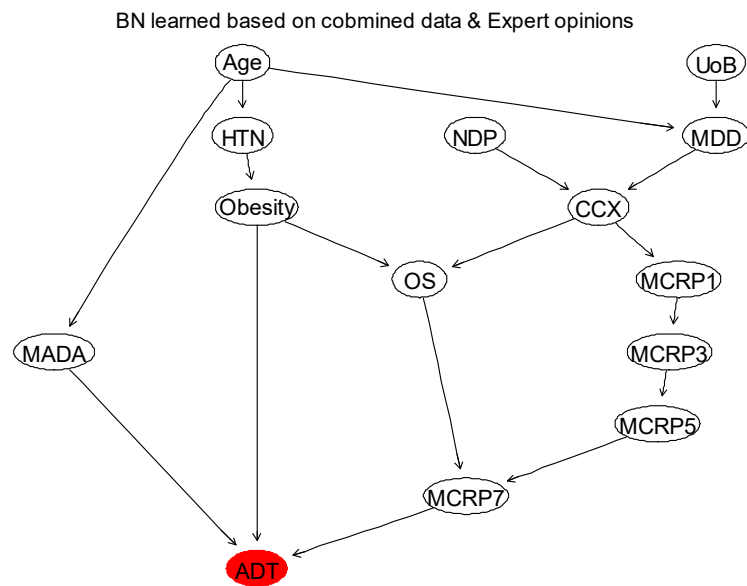

**Figure S1:** The BN that is learned from the combination of data and expert opinions, to model “ADT” in terms of the first 11 most relevant factors.

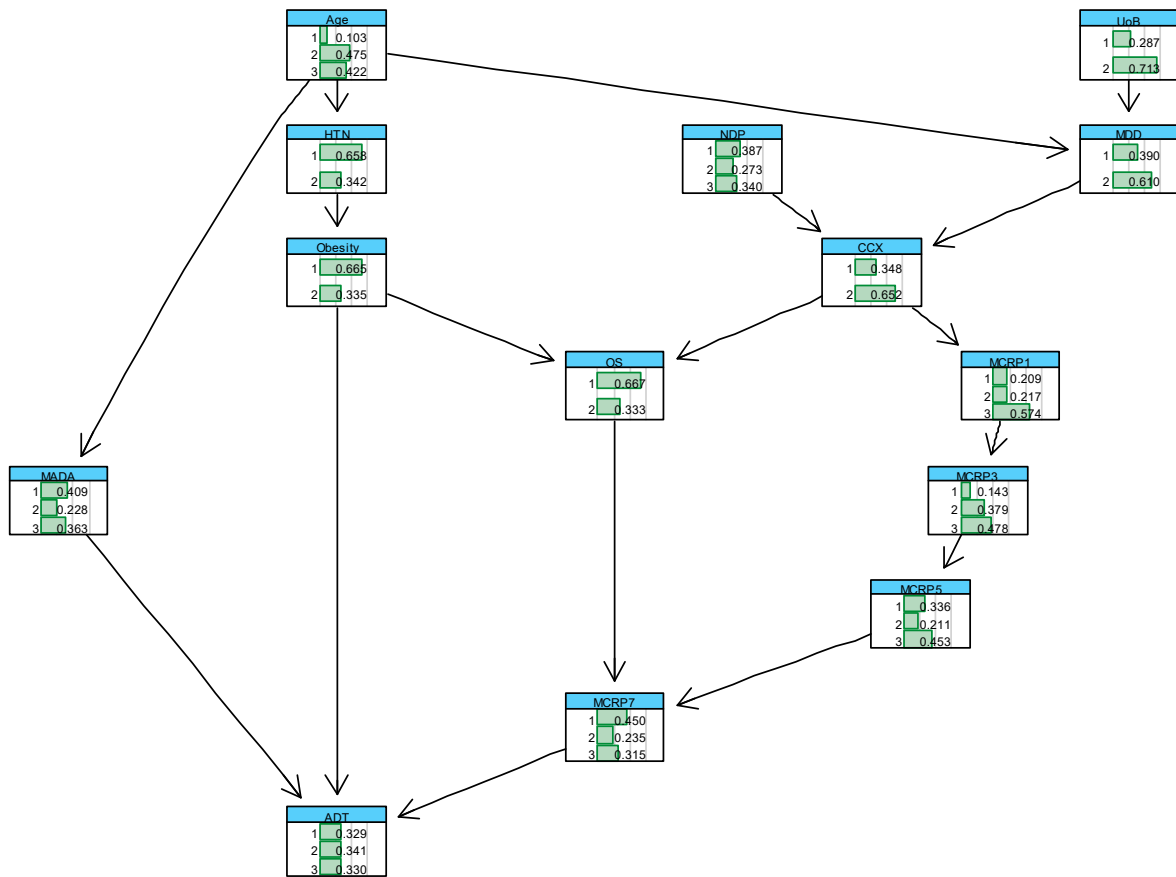

**Figure S2:** The BN with conditional probability tables learned for “ADT” outcome based on the combined elicited domain expert opinions with the (balanced) data.

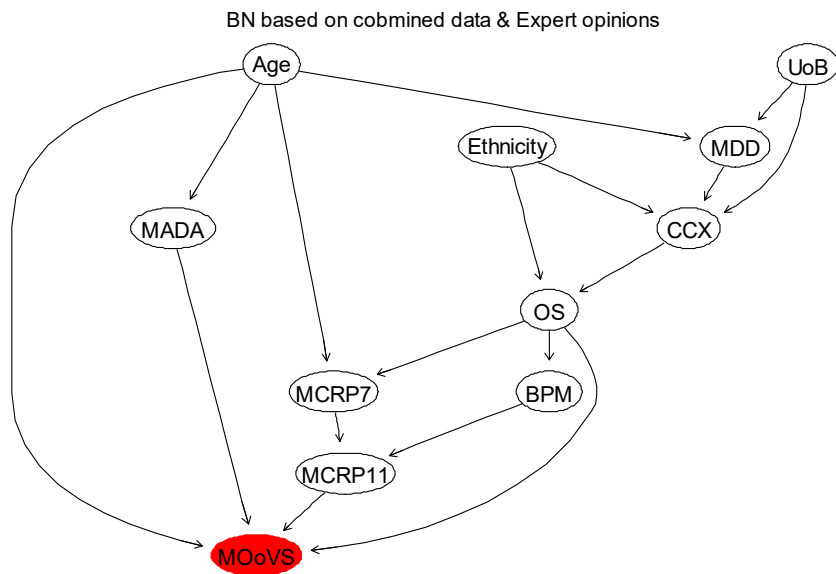

**Figure S3:** The BN that is learned from the combined data and non-domain expert opinions to model “MOoVS” in terms of the most influencing factors.

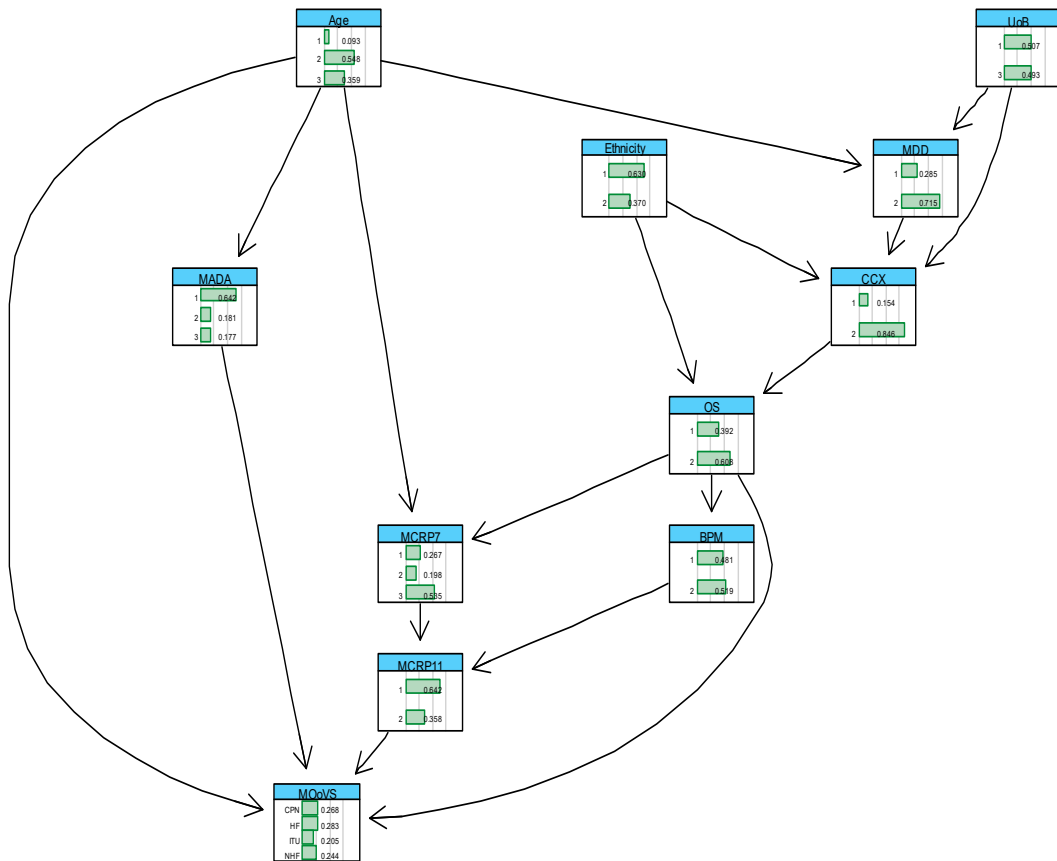

Figure S4: The BN with conditional probability tables learned for “MOoVS” outcome based on the combined elicited domain expert opinions with the (balanced) data.

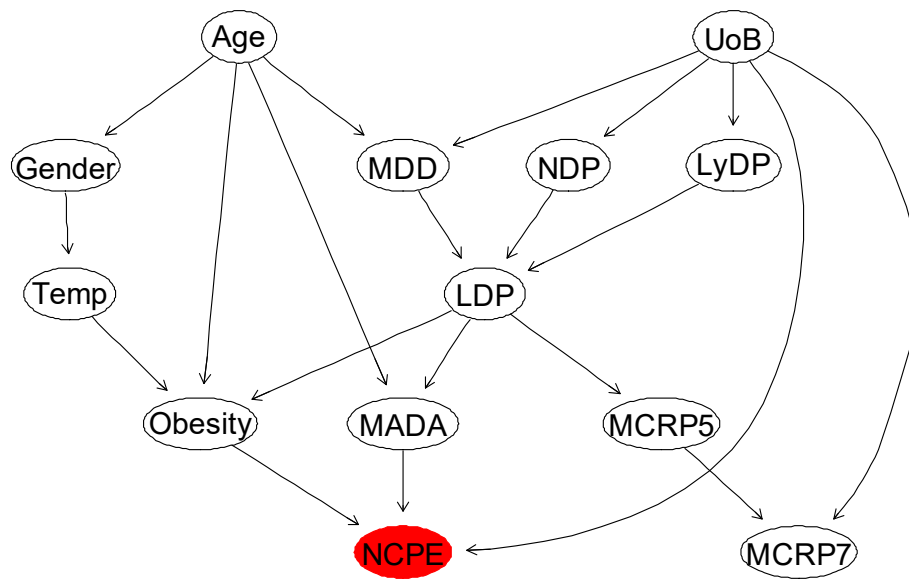

**Figure S5:** The BN that is learned from the combined data and domain expert opinions to model “NCPE” in terms of its most influencing factors.

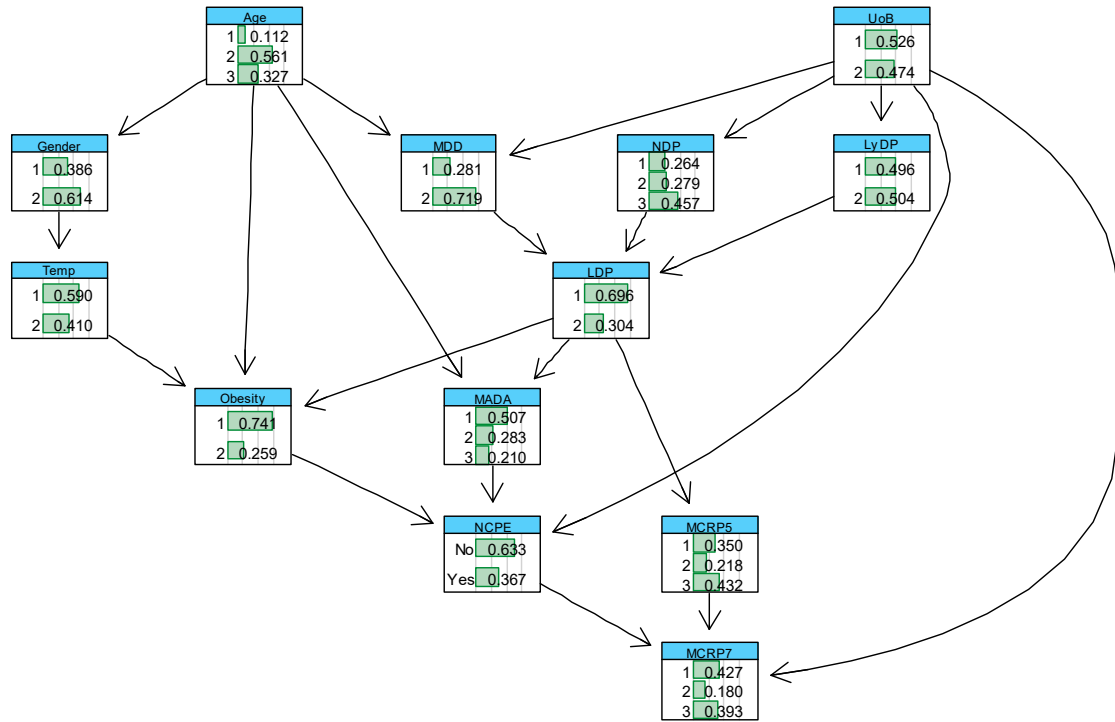

**Figure S6:** The BN for “NCPE”, as shown in Supplementary Figure 5, augmented with the computed conditional probability tables learned from data. The marginal probability table of each variable, after the whole dataset was balanced with respect to the NCPE, can be observed on each node.
